# Supplementary material for: Immunotoxicity of Per- and Polyfluoroalkyl Substances: Insights into Short-Chain PFAS Exposure
Source: MDPI journal article supplement (doi:10.3390/toxics9050100), 2021-05-01
Supplement: s1 [file s1]

# Supplementary Materials: Immunotoxicity of Per- and Polyfluoroalkyl Substances: In-sights into Short-Chain PFAS Exposure

Tracey Woodlief \*, Samuel Vance, Qing Hu and Jamie DeWitt

**Table S1.** Mean ( $\pm$  standard deviation) serum PFMOAA, PFMOPrA or PFMOBA concentrations in male and female C57BL/6 mice ( $n = 4-6$  per group) orally exposed to PFMOAA, PFMOPrA or PFMOBA for 30-days. Samples were collected one day after dosing ended and were pooled per cage for analysis ( $n = 3$  mice/tube;  $n = 2$  tubes per dose group).

| Male               |                     | Female             |                  |
|--------------------|---------------------|--------------------|------------------|
| Dose group (mg/kg) | PFMOAA (ng/mL)      | Dose group (mg/kg) | PFMOAA (ng/mL)   |
| 0.0                | < LOD (0.5) U       | 0                  | < LOD (0.5) U    |
| 0.00025            | < LOD (0.5) U       | 0.00025            | < LOD (0.5) U    |
| 0.025              | < LOD (0.5) U       | 0.025              | < LOD (0.5) U    |
| 2.5                | < LOD (0.5) U       | 2.5                | < LOD (0.5) U    |
| Dose group (mg/kg) | PFMOPrA (ng/mL)     | Dose group (mg/kg) | PFMOPrA (ng/mL)  |
| 0.0                | < LOD (1.2) U       | 0.0                | < LOD (1.2) U    |
| 0.5                | 48.00 $\pm$ 9.33    | 0.5                | < LOD (1.2) U    |
| 5.0                | 366.50 $\pm$ 142.13 | 5.0                | 4.13 $\pm$ 0.59  |
| 50                 | 872.50 $\pm$ 392.44 | 50                 | 28.40 $\pm$ 6.08 |
| Dose group (mg/kg) | PFMOBA (ng/mL)      | Dose group (mg/kg) | PFMOBA (ng/mL)   |
| 0.0                | < LOD (7.4) U       | 0.0                | < LOD (7.4) U    |
| 0.5                | < LOD (7.4) U       | 0.5                | < LOD (7.4) U    |
| 5.0                | < LOD (7.4) U       | 5.0                | < LOD (7.4) U    |
| 50                 | < LOD (7.4) U       | 50                 | < LOD (7.4) U    |

Abbreviations: perfluoro-2-methoxyacetic acid (PFMOAA), perfluoro-2-methoxypropanoic acid (PFMOPrA), perfluoro-4-methoxybutanoic acid (PFMOBA) Level of detection (LOD), Units (U).

**Table S2.** Mean ( $\pm$  standard deviation) body and relative organ weights of male C57BL/6 mice ( $n = 4-6$  per group) orally exposed to PFMOAA, PFMOPrA, or PFMOBA for 30 days. Weights were collected one day after dosing ended.

| PFMOAA                              | Group 1 (0.0 mg/kg) | Group 2 (0.00025 mg/kg) | Group 3 (0.025 mg/kg) | Group 4 (2.5 mg/kg) |
|-------------------------------------|---------------------|-------------------------|-----------------------|---------------------|
| Terminal body weight (g)            | 23.73 $\pm$ 1.28    | 24.42 $\pm$ 2.46        | 24.45 $\pm$ 1.50      | 24.30 $\pm$ 1.36    |
| Terminal liver-free body weight (g) | 22.54 $\pm$ 1.20    | 23.22 $\pm$ 2.32        | 23.16 $\pm$ 1.41      | 23.03 $\pm$ 1.29    |
| Spleen (mg/g)                       | 3.36 $\pm$ 0.33     | 3.45 $\pm$ 1.18         | 3.82 $\pm$ 0.75       | 3.91 $\pm$ 1.24     |
| Thymus (mg/g)                       | 2.29 $\pm$ 0.39     | 2.00 $\pm$ 0.26         | 2.19 $\pm$ 0.34       | 2.49 $\pm$ 0.44     |
| Brain (mg/g)                        | 16.97 $\pm$ 1.03    | 16.77 $\pm$ 1.14        | 16.42 $\pm$ 0.91      | 16.47 $\pm$ 0.61    |
| Liver (mg/g)                        | 50.39 $\pm$ 1.21    | 48.76 $\pm$ 2.88        | 52.64 $\pm$ 1.84      | 52.19 $\pm$ 4.25    |
| Heart (mg/g)                        | 4.79 $\pm$ 0.43     | 4.79 $\pm$ 0.45         | 4.96 $\pm$ 0.60       | 5.15 $\pm$ 0.53     |
| Kidney (mg/g)                       | 12.22 $\pm$ 0.40    | 11.92 $\pm$ 0.67        | 12.36 $\pm$ 0.60      | 12.60 $\pm$ 0.67    |
| PFMOPrA                             | Group 1 (0.0 mg/kg) | Group 2 (0.5 mg/kg)     | Group 3 (5.0 mg/kg)   | Group 4 (50 mg/kg)  |
| Terminal body weight (g)            | 24.10 $\pm$ 1.15    | 25.58 $\pm$ 1.21        | 25.36 $\pm$ 1.36      | 25.82 $\pm$ 1.15    |
| Terminal liver-free body weight (g) | 22.89 $\pm$ 1.10    | 24.28 $\pm$ 1.17        | 24.04 $\pm$ 1.25      | 24.15 $\pm$ 1.02    |
| Spleen (mg/g)                       | 3.92 $\pm$ 0.70     | 3.54 $\pm$ 0.45         | 3.37 $\pm$ 0.26       | 3.48 $\pm$ 0.36     |

|                                     |                     |                     |                     |                    |
|-------------------------------------|---------------------|---------------------|---------------------|--------------------|
| Thymus (mg/g)                       | 2.76 ± 0.74         | 2.57 ± 0.53         | 2.45 ± 0.19         | 2.09 ± 0.96        |
| Brain (mg/g)                        | 17.45 ± 0.73        | 15.87 ± 0.74        | 16.16 ± 0.61        | 16.08 ± 0.71       |
| Liver (mg/g)                        | 50.20 ± 1.49        | 50.52 ± 1.15        | 52.03 ± 2.79        | 64.50 ± 6.47       |
| Heart (mg/g)                        | 4.67 ± 0.27         | 5.43 ± 0.54         | 5.11 ± 0.70         | 5.00 ± 0.37        |
| Lungs (mg/g)                        | 6.69 ± 0.97         | 9.21 ± 2.17         | 8.67 ± 2.40         | 7.39 ± 0.63        |
| Kidneys (mg/g)                      | 12.75 ± 1.04        | 13.00 ± 1.16        | 14.03 ± 1.04        | 13.37 ± 0.71       |
| PFMObA                              | Group 1 (0.0 mg/kg) | Group 2 (0.5 mg/kg) | Group 3 (5.0 mg/kg) | Group 4 (50 mg/kg) |
| Terminal body weight (g)            | 24.92 ± 2.29        | 26.52 ± 1.91        | 26.10 ± 2.51        | 24.53 ± 2.19       |
| Terminal liver-free body weight (g) | 23.76 ± 2.23        | 25.19 ± 1.79        | 24.81 ± 2.36        | 23.21 ± 2.02       |
| Spleen (mg/g)                       | 4.10 ± 1.51         | 4.19 ± 1.11         | 3.81 ± 1.23         | 4.89 ± 1.09        |
| Thymus (mg/g)                       | 2.50 ± 0.75         | 2.07 ± 0.42         | 2.13 ± 0.58         | 2.21 ± 0.28        |
| Brain (mg/g)                        | 16.68 ± 1.57        | 15.38 ± 0.70        | 15.59 ± 0.77        | 16.58 ± 1.63       |
| Liver (mg/g)                        | 46.73 ± 5.34        | 49.87 ± 2.27        | 49.51 ± 2.15        | 53.61 ± 3.68*      |
| Heart (mg/g)                        | 4.86 ± 0.83         | 5.11 ± 0.30         | 5.62 ± 0.82         | 5.18 ± 0.96        |
| Lungs (mg/g)                        | 7.28 ± 1.69         | 6.50 ± 0.79         | 6.92 ± 0.42         | 7.09 ± 1.99        |
| Kidney (mg/g)                       | 12.62 ± 1.50        | 12.74 ± 0.76        | 13.09 ± 0.56        | 12.55 ± 1.10       |
| PFOA                                | 7.5 mg/kg           |                     |                     |                    |
| Terminal body weight (g)            | 21.8 ± 1.14         |                     |                     |                    |
| Terminal liver-free body weight (g) | 19.05 ± 0.96*       |                     |                     |                    |
| Spleen (mg/kg)                      | 3.38 ± 0.44         |                     |                     |                    |
| Thymus (mg/kg)                      | 2.48 ± 0.28         |                     |                     |                    |
| Liver (mg/kg)                       | 125.4 ± 9.91*       |                     |                     |                    |

Abbreviations: perfluoro-2-methoxyacetic acid (PFMOAA), perfluoro-2-methoxypropanoic acid (PFMOPrA), perfluoro-4-methoxybutanoic acid (PFMOBA), mg organ weight/ body weight (mg/g) grams (g), and milligrams (mg). \* $p < 0.05$  versus control.

**Table S3.** Mean (± standard deviation) body and relative organ weights of female C57BL/6 mice ( $n = 4-6$  per group) orally exposed to PFMOAA, PFMOPrA, or PFMOBA for 30 days. Weights were collected one day after dosing ended.

| PFMOAA                              | Group 1 (0.0 mg/kg) | Group 2 (0.00025 mg/kg) | Group 3 (0.025 mg/kg) | Group 4 (2.5 mg/kg) |
|-------------------------------------|---------------------|-------------------------|-----------------------|---------------------|
| Terminal body weight (g)            | 21.20 ± 1.06        | 21.87 ± 1.07            | 21.45 ± 0.92          | 20.66 ± 2.12        |
| Terminal Liver free body weight (g) | 20.23 ± 1.00        | 20.81 ± 1.04            | 20.41 ± 0.86          | 19.65 ± 1.96        |
| Spleen (mg/g)                       | 4.35 ± 0.41         | 4.79 ± 0.89             | 4.88 ± 0.27           | 4.51 ± 0.43         |
| Thymus (mg/g)                       | 3.48 ± 0.44         | 3.30 ± 0.54             | 3.14 ± 0.36           | 3.41 ± 0.79         |
| Brain (mg/g)                        | 19.48 ± 1.29        | 19.23 ± 0.74            | 19.09 ± 0.82          | 20.28 ± 1.69        |
| Liver (mg/g)                        | 45.66 ± 2.69        | 48.43 ± 3.04            | 48.33 ± 1.49          | 48.72 ± 4.17        |
| Heart (mg/g)                        | 4.81 ± 0.63         | 5.50 ± 0.41             | 5.29 ± 0.45           | 5.66 ± 0.80         |
| Kidney (mg/g)                       | 11.95 ± 0.92        | 12.36 ± 0.77            | 11.80 ± 0.72          | 12.35 ± 0.61        |
| PFMOPrA                             | Group 1 (0.0 mg/kg) | Group 2 (0.5 mg/kg)     | Group 3 (5.0 mg/kg)   | Group 4 (50 mg/kg)  |
| Terminal body weight (g)            | 22.60 ± 2.05        | 22.07 ± 1.72            | 23.25 ± 0.85          | 22.07 ± 1.49        |
| Terminal Liver free body weight (g) | 21.50 ± 1.91        | 21.04 ± 1.62            | 22.13 ± 0.77          | 21.00 ± 1.38        |
| Spleen (mg/g)                       | 4.92 ± 0.27         | 4.83 ± 0.33             | 4.72 ± 0.40           | 4.59 ± 0.29         |
| Thymus (mg/g)                       | 3.31 ± 0.38         | 3.30 ± 0.28             | 3.33 ± 0.42           | 2.80 ± 0.25         |
| Brain (mg/g)                        | 18.59 ± 1.20        | 18.85 ± 1.10            | 17.90 ± 0.71          | 17.04 ± 1.23        |
| Liver (mg/g)                        | 48.52 ± 3.29        | 46.35 ± 2.75            | 48.23 ± 2.90          | 42.77 ± 2.90        |
| Heart (mg/g)                        | 5.86 ± 0.58         | 5.46 ± 0.60             | 4.71 ± 0.36           | 4.77 ± 0.39         |
| Lungs (mg/g)                        | 7.44 ± 1.03         | 9.49 ± 2.59             | 10.04 ± 2.48          | 8.20 ± 1.74         |
| Kidney (mg/g)                       | 10.46 ± 0.36        | 11.71 ± 1.24            | 11.75 ± 0.41          | 10.69 ± 0.66        |
| PFMOBA                              | Group 1 (0.0 mg/kg) | Group 2 (0.5 mg/kg)     | Group 3 (5.0 mg/kg)   | Group 4 (50 mg/kg)  |
| Terminal body weight (g)            | 20.83 ± 2.07        | 21.14 ± 1.02            | 21.03 ± 1.59          | 20.97 ± 1.43        |
| Terminal Liver free body weight (g) | 19.91 ± 1.98        | 20.12 ± 0.95            | 20.02 ± 1.56          | 19.97 ± 1.37        |
| Spleen (mg/g)                       | 5.03 ± 0.54         | 4.91 ± 0.58             | 6.17 ± 3.47           | 4.77 ± 0.76         |
| Thymus (mg/g)                       | 3.44 ± 0.51         | 3.33 ± 0.59             | 3.68 ± 0.90           | 3.56 ± 0.55         |

|                                     |                |              |              |              |
|-------------------------------------|----------------|--------------|--------------|--------------|
| Brain (mg/g)                        | 20.45 ± 1.41   | 19.49 ± 0.64 | 19.41 ± 1.21 | 19.32 ± 1.24 |
| Liver (mg/g)                        | 44.10 ± 6.48   | 48.21 ± 2.99 | 48.45 ± 2.87 | 47.62 ± 2.64 |
| Heart (mg/g)                        | 5.15 ± 0.68    | 5.13 ± 0.64  | 5.75 ± 1.06  | 5.19 ± 0.76  |
| Lungs (mg/g)                        | 8.32 ± 0.84    | 8.23 ± 0.95  | 9.03 ± 1.23  | 8.40 ± 2.08  |
| Kidney (mg/g)                       | 10.98 ± 0.90   | 11.10 ± 0.44 | 11.30 ± 1.14 | 10.93 ± 1.94 |
| PFOA                                | 7.5 mg/kg      |              |              |              |
| Terminal body weight (g)            | 17.2 ± 0.88*   |              |              |              |
| Terminal liver-free body weight (g) | 14.49 ± 0.68*  |              |              |              |
| Spleen (mg/kg)                      | 2.79 ± 0.38*   |              |              |              |
| Thymus (mg/kg)                      | 2.97 ± 1.58    |              |              |              |
| Liver (mg/kg)                       | 156.17 ± 4.66* |              |              |              |

Abbreviations: perfluoro-2-methoxyacetic acid (PFMOAA), perfluoro-2-methoxypropanoic acid (PFMOPrA), perfluoro-4-methoxybutanoic acid (PFMOBA), mg organ weight/ body weight (mg/g), grams (g), and milligrams (mg). \* $p < 0.05$  versus control.

**Table S4.** Mean ( $\pm$  standard deviation) number of thymic lymphocytes, adjusted to the total number of cells in the thymus (cellularity) of male C57BL/6 mice ( $n = 4-6$  per group) orally exposed to PFMOAA, PFMOPrA, or PFMOBA for 30 days. Cells were analyzed by flow cytometry one day after dosing ended.

| PFMOAA        | Organ total cellularity ( $e^7$ ) | Cells/mg organ weight ( $e^6$ ) | CD4 $^+$ ( $e^5$ ) | CD8 $^+$ ( $e^6$ ) | CD4 $^+$ CD8 $^+$ ( $e^6$ ) | CD4 $^+$ CD8 $^-$ ( $e^5$ ) |
|---------------|-----------------------------------|---------------------------------|--------------------|--------------------|-----------------------------|-----------------------------|
| 0.0 mg/kg     | 6.35 ± 1.42                       | 1.19 ± 0.29                     | 6.78 ± 1.66        | 2.69 ± 0.42        | 2.27 ± 0.55                 | 3.25 ± 0.93                 |
| 0.00025 mg/kg | 7.66 ± 1.31                       | 1.58 ± 0.18                     | 10.82 ± 2.67       | 4.24 ± 0.97        | 3.03 ± 0.69                 | 4.80 ± 1.41                 |
| 0.025 mg/kg   | 7.73 ± 2.11                       | 1.45 ± 0.35                     | 11.57 ± 2.82       | 4.31 ± 0.93        | 3.23 ± 0.96                 | 4.42 ± 1.71                 |
| 2.5 mg/kg     | 7.47 ± 1.17                       | 1.27 ± 0.29                     | 8.00 ± 1.57        | 3.35 ± 0.99        | 2.81 ± 0.47                 | 4.15 ± 0.98                 |
| PFMOPrA       | Organ total cellularity ( $e^7$ ) | Cells/mg organ weight ( $e^6$ ) | CD4 $^+$ ( $e^5$ ) | CD8 $^+$ ( $e^5$ ) | CD4 $^+$ CD8 $^+$ ( $e^5$ ) | CD4 $^+$ CD8 $^-$ ( $e^4$ ) |
| 0.0 mg/kg     | 8.98 ± 1.07                       | 1.36 ± 0.30                     | 5.87 ± 1.63        | 1.29 ± 0.31        | 4.88 ± 0.61                 | 7.03 ± 2.57                 |
| 0.5 mg/kg     | 9.08 ± 0.98                       | 1.44 ± 0.37                     | 6.32 ± 1.71        | 1.43 ± 0.41        | 5.19 ± 1.48                 | 5.65 ± 1.45                 |
| 5.0 mg/kg     | 8.26 ± 1.10                       | 1.33 ± 0.15                     | 5.59 ± 0.65        | 1.26 ± 0.20        | 5.03 ± 0.63                 | 6.13 ± 1.95                 |
| 50 mg/kg      | 8.89 ± 0.66                       | 1.56 ± 0.35                     | 6.28 ± 1.32        | 1.63 ± 0.55        | 5.98 ± 1.39                 | 7.88 ± 2.98                 |
| PFMOBA        | Organ total cellularity ( $e^7$ ) | Cells/mg organ weight ( $e^5$ ) | CD4 $^+$ ( $e^5$ ) | CD8 $^+$ ( $e^4$ ) | CD4 $^+$ CD8 $^+$ ( $e^4$ ) | CD4 $^+$ CD8 $^-$ ( $e^4$ ) |
| 0.0 mg/kg     | 3.40 ± 1.56                       | 5.57 ± 2.81                     | 3.03 ± 1.63        | 5.74 ± 3.97        | 7.65 ± 4.34                 | 3.51 ± 1.75                 |
| 0.5 mg/kg     | 3.73 ± 0.91                       | 7.08 ± 2.40                     | 3.98 ± 1.30        | 7.88 ± 3.19        | 11.78 ± 6.83                | 4.03 ± 1.27                 |
| 5.0 mg/kg     | 4.13 ± 0.85                       | 7.98 ± 3.01                     | 4.59 ± 1.73        | 10.13 ± 4.76       | 9.83 ± 4.08                 | 5.40 ± 1.82                 |
| 50 mg/kg      | 3.89 ± 0.21                       | 7.30 ± 0.10                     | 4.06 ± 0.68        | 9.47 ± 1.61        | 110.54 ± 246.14             | 3.89 ± 0.67                 |

Data are presented as the mean cell number  $\pm$  standard deviation based on a total of 10,000 events.  $n = 4-6$  animals/sex/dose. Abbreviations: perfluoro-2-methoxyacetic acid (PFMOAA), perfluoro-2-methoxypropanoic acid (PFMOPrA), and perfluoro-4-methoxybutanoic acid (PFMOBA).

**Table S5.** Mean ( $\pm$  standard deviation) absolute number of thymic lymphocytes, adjusted to the total number of cells in the thymus (cellularity) of female C57BL/6 mice ( $n = 4-6$  per group) orally exposed to PFMOAA, PFMOPrA, or PFMOBA for 30 days. Cells were analyzed by flow cytometry one day after dosing ended.

| PFMOAA        | Organ total cellularity ( $e^7$ ) | Cells/mg organ weight ( $e^5$ ) | CD4 $^+$ ( $e^6$ ) | CD8 $^+$ ( $e^6$ ) | CD4 $^+$ CD8 $^+$ ( $e^6$ ) | CD4 $^+$ CD8 $^-$ ( $e^5$ ) |
|---------------|-----------------------------------|---------------------------------|--------------------|--------------------|-----------------------------|-----------------------------|
| 0.0 mg/kg     | 7.21 ± 1.91                       | 1.75 ± 0.45                     | 1.02 ± 0.25        | 4.05 ± 0.32        | 1.82 ± 0.70                 | 4.92 ± 1.57                 |
| 0.00025 mg/kg | 5.03 ± 1.60                       | 1.19 ± 0.35                     | 0.57 ± 0.22        | 2.75 ± 0.79        | 0.95 ± 0.42                 | 5.12 ± 2.46                 |
| 0.025 mg/kg   | 6.02 ± 2.82                       | 1.47 ± 0.67                     | 0.57 ± 0.29        | 2.87 ± 1.44        | 1.07 ± 0.71                 | 5.23 ± 1.94                 |
| 2.5 mg/kg     | 8.45 ± 1.76                       | 2.03 ± 0.41                     | 1.13 ± 0.28        | 4.48 ± 1.02        | 1.64 ± 0.55                 | 3.99 ± 1.09                 |
| PFMOPrA       | Organ total cellularity ( $e^7$ ) | Cells/mg organ weight ( $e^6$ ) | CD4 $^+$ ( $e^7$ ) | CD8 $^+$ ( $e^6$ ) | CD4 $^+$ CD8 $^+$ ( $e^7$ ) | CD4 $^+$ CD8 $^-$ ( $e^6$ ) |
| 0.0 mg/kg     | 8.17 ± 1.33                       | 1.10 ± 0.19                     | 3.27 ± 0.24        | 7.06 ± 1.42        | 2.92 ± 3.39                 | 3.93 ± 1.20                 |
| 0.5 mg/kg     | 8.36 ± 3.89                       | 1.15 ± 0.53                     | 2.83 ± 0.29        | 7.47 ± 1.07        | 2.55 ± 0.61                 | 3.91 ± 0.60                 |
| 5.0 mg/kg     | 9.65 ± 3.85                       | 1.26 ± 0.50                     | 3.76 ± 0.39        | 9.45 ± 0.98        | 3.04 ± 1.42                 | 5.07 ± 0.61                 |
| 50 mg/kg      | 10.84 ± 1.67                      | 1.56 ± 0.24                     | 2.31 ± 0.33        | 5.76 ± 1.00        | 2.51 ± 0.33                 | 2.88 ± 0.58                 |
| PFMOBA        | Organ total cellularity ( $e^7$ ) | Cells/mg organ weight ( $e^5$ ) | CD4 $^+$ ( $e^5$ ) | CD8 $^+$ ( $e^4$ ) | CD4 $^+$ CD8 $^+$ ( $e^5$ ) | CD4 $^+$ CD8 $^-$ ( $e^4$ ) |
| 0.0 mg/kg     | 4.31 ± 1.13                       | 6.28 ± 2.33                     | 2.70 ± 0.99        | 5.56 ± 1.72        | 1.86 ± 0.63                 | 3.30 ± 1.32                 |

|           |             |             |             |             |             |             |
|-----------|-------------|-------------|-------------|-------------|-------------|-------------|
| 0.5 mg/kg | 4.87 ± 1.06 | 7.02 ± 1.45 | 3.12 ± 0.70 | 5.42 ± 1.91 | 2.17 ± 0.70 | 4.24 ± 1.24 |
| 5.0 mg/kg | 6.56 ± 1.45 | 8.75 ± 2.30 | 2.59 ± 1.00 | 7.26 ± 1.71 | 2.59 ± 1.00 | 5.03 ± 0.21 |
| 50 mg/kg  | 5.01 ± 0.74 | 6.87 ± 1.34 | 1.68 ± 0.82 | 5.84 ± 1.58 | 1.68 ± 0.82 | 4.55 ± 0.10 |

Data are presented as the mean cell number ± standard deviation based on a total of 10,000 events.  $n = 4-6$  per group. Abbreviations: perfluoro-2-methoxyacetic acid (PFMOAA), perfluoro-2-methoxypropanoic acid (PFMOPrA), and perfluoro-4-methoxybutanoic acid (PFMOBA).

**Table S6.** Mean (± standard deviation) absolute number of splenic lymphocytes, adjusted to the total number of cells in the spleen (cellularity) of male C57BL/6 mice ( $n = 4-6$  per group) orally exposed to PFMOAA, PFMOPrA, or PFMOBA for 30 days. Cells were analyzed by flow cytometry one day after dosing ended.

| PFMOAA        | Organ total cellularity (e <sup>7</sup> ) | Cells/mg organ weight (e <sup>5</sup> ) | CD4 <sup>+</sup> (e <sup>6</sup> ) | CD8 <sup>+</sup> (e <sup>6</sup> ) | CD4 <sup>+</sup> CD8 <sup>+</sup> (e <sup>4</sup> ) | CD4 <sup>+</sup> CD8 <sup>+</sup> (e <sup>5</sup> ) |
|---------------|-------------------------------------------|-----------------------------------------|------------------------------------|------------------------------------|-----------------------------------------------------|-----------------------------------------------------|
| 0.0 mg/kg     | 3.29 ± 1.31                               | 4.22 ± 1.81                             | 3.91 ± 1.52                        | 6.46 ± 3.12                        | 1.30 ± 0.78                                         | 6.41 ± 2.25                                         |
| 0.00025 mg/kg | 2.83 ± 1.17                               | 3.59 ± 1.79                             | 3.79 ± 1.39                        | 5.49 ± 2.70                        | 1.59 ± 1.10                                         | 6.62 ± 1.91                                         |
| 0.025 mg/kg   | 4.42 ± 2.23                               | 5.03 ± 3.14                             | 4.95 ± 2.46                        | 8.48 ± 5.07                        | 1.02 ± 0.34                                         | 8.50 ± 3.88                                         |
| 2.5 mg/kg     | 6.01 ± 1.94                               | 6.34 ± 0.81                             | 6.23 ± 1.21                        | 12.55 ± 3.47                       | 3.73 ± 2.30                                         | 12.10 ± 0.42                                        |
| PFMOPrA       | Organ total cellularity (e <sup>7</sup> ) | Cells/mg organ weight (e <sup>5</sup> ) | CD4 <sup>+</sup> (e <sup>5</sup> ) | CD8 <sup>+</sup> (e <sup>4</sup> ) | CD4 <sup>+</sup> CD8 <sup>+</sup> (e <sup>2</sup> ) | CD4 <sup>+</sup> CD8 <sup>+</sup> (e <sup>3</sup> ) |
| 0.0 mg/kg     | 5.60 ± 0.18                               | 6.12 ± 1.26                             | 1.29 ± 0.17                        | 7.27 ± 1.30                        | 3.68 ± 1.20                                         | 8.13 ± 1.85                                         |
| 0.5 mg/kg     | 5.81 ± 1.09                               | 6.39 ± 0.56                             | 1.20 ± 0.13                        | 6.43 ± 1.05                        | 2.23 ± 1.98                                         | 7.46 ± 1.29                                         |
| 5.0 mg/kg     | 3.75 ± 0.74                               | 4.39 ± 0.80                             | 0.90 ± 0.17                        | 5.11 ± 0.91*                       | 2.50 ± 0.82                                         | 5.31 ± 1.15                                         |
| 50 mg/kg      | 5.95 ± 1.39                               | 6.66 ± 1.65                             | 1.26 ± 0.31                        | 6.91 ± 1.59                        | 2.67 ± 1.81                                         | 7.51 ± 1.56                                         |
| PFMOBA        | Organ total cellularity (e <sup>7</sup> ) | Cells/mg organ weight (e <sup>5</sup> ) | CD4 <sup>+</sup> (e <sup>4</sup> ) | CD8 <sup>+</sup> (e <sup>4</sup> ) | CD4 <sup>+</sup> CD8 <sup>+</sup> (e <sup>2</sup> ) | CD4 <sup>+</sup> CD8 <sup>+</sup> (e <sup>3</sup> ) |
| 0.0 mg/kg     | 2.29 ± 1.02                               | 2.24 ± 0.99                             | 4.27 ± 2.21                        | 2.21 ± 1.10                        | 1.16 ± 0.79                                         | 2.93 ± 0.86                                         |
| 0.5 mg/kg     | 4.44 ± 0.57                               | 4.16 ± 0.73                             | 7.64 ± 1.15                        | 3.98 ± 0.71                        | 1.78 ± 0.66                                         | 4.43 ± 0.30                                         |
| 5.0 mg/kg     | 4.21 ± 0.77                               | 4.57 ± 1.45                             | 8.20 ± 2.67                        | 4.18 ± 1.59                        | 1.70 ± 0.65                                         | 4.96 ± 1.60                                         |
| 50 mg/kg      | 4.08 ± 0.64                               | 3.52 ± 0.71                             | 5.62 ± 2.32                        | 2.82 ± 1.16                        | 1.34 ± 0.86                                         | 4.05 ± 0.53*                                        |

Data are presented as the mean cell number ± standard deviation based on a total of 10,000 events.  $N = 4-6$  per group. Abbreviations: perfluoro-2-methoxyacetic acid (PFMOAA), perfluoro-2-methoxypropanoic acid (PFMOPrA), and perfluoro-4-methoxybutanoic acid (PFMOBA) \*  $p < 0.05$  versus control.

**Table S7.** Mean (± standard deviation) absolute number of splenic lymphocytes, adjusted to the total number of cells in the spleen (cellularity) of female C57BL/6 mice ( $n = 4-6$  per group) orally exposed to PFMOAA, PFMOPrA, or PFMOBA for 30 days. Cells were analyzed by flow cytometry one day after dosing ended.

| PFMOAA        | Organ total cellularity (e <sup>7</sup> ) | Cells/mg organ weight (e <sup>5</sup> ) | CD4 <sup>+</sup> (e <sup>6</sup> ) | CD8 <sup>+</sup> (e <sup>6</sup> ) | CD4 <sup>+</sup> CD8 <sup>+</sup> (e <sup>4</sup> ) | CD4 <sup>+</sup> CD8 <sup>+</sup> (e <sup>5</sup> ) |
|---------------|-------------------------------------------|-----------------------------------------|------------------------------------|------------------------------------|-----------------------------------------------------|-----------------------------------------------------|
| 0.0 mg/kg     | 4.51 ± 0.34                               | 5.74 ± 0.48                             | 5.61 ± 0.47                        | 9.76 ± 0.72                        | 2.69 ± 2.40                                         | 8.21 ± 1.11                                         |
| 0.00025 mg/kg | 4.83 ± 1.90                               | 6.73 ± 2.31                             | 4.94 ± 1.93                        | 8.71 ± 4.22                        | 2.72 ± 1.34                                         | 9.13 ± 3.12                                         |
| 0.025 mg/kg   | 3.21 ± .051                               | 4.80 ± 0.84                             | 3.82 ± 0.67                        | 4.95 ± 0.88                        | 2.09 ± 1.69                                         | 6.64 ± 0.83                                         |
| 2.5 mg/kg     | 4.16 ± 1.71                               | 6.49 ± 3.84                             | 4.92 ± 1.80                        | 8.15 ± 3.49                        | 2.78 ± 0.89                                         | 7.73 ± 2.19                                         |
| PFMOPrA       | Organ total cellularity (e <sup>7</sup> ) | Cells/mg organ weight (e <sup>5</sup> ) | CD4 <sup>+</sup> (e <sup>4</sup> ) | CD8 <sup>+</sup> (e <sup>4</sup> ) | CD4 <sup>+</sup> CD8 <sup>+</sup> (e <sup>2</sup> ) | CD4 <sup>+</sup> CD8 <sup>+</sup> (e <sup>3</sup> ) |
| 0.0 mg/kg     | 7.85 ± 0.76                               | 7.13 ± 0.94                             | 1.48 ± 0.20                        | 7.81 ± 0.51                        | 2.70 ± 1.81                                         | 1.07 ± 0.21                                         |
| 0.5 mg/kg     | 6.97 ± 0.94*                              | 6.55 ± 0.52                             | 1.33 ± 0.01                        | 6.65 ± 0.85                        | 3.46 ± 1.67                                         | 1.00 ± 0.12                                         |
| 5.0 mg/kg     | 9.37 ± .043*                              | 8.60 ± 0.68*                            | 1.70 ± 0.20                        | 8.75 ± 0.50                        | 5.33 ± 2.25                                         | 1.31 ± 0.14                                         |
| 50 mg/kg      | 6.04 ± 0.53*                              | 6.02 ± *0.83                            | 1.25 ± 0.01                        | 6.91 ± 0.54                        | 4.07 ± 1.21                                         | 0.94 ± 0.16                                         |
| PFMOBA        | Organ total cellularity (e <sup>7</sup> ) | Cells/mg organ weight (e <sup>5</sup> ) | CD4 <sup>+</sup> (e <sup>5</sup> ) | CD8 <sup>+</sup> (e <sup>4</sup> ) | CD4 <sup>+</sup> CD8 <sup>+</sup> (e <sup>2</sup> ) | CD4 <sup>+</sup> CD8 <sup>+</sup> (e <sup>4</sup> ) |
| 0.0 mg/kg     | 8.49 ± 2.63                               | 8.38 ± 3.07                             | 1.65 ± 0.58                        | 9.25 ± 0.35                        | 7.73 ± 4.15                                         | 1.65 ± 0.66                                         |
| 0.5 mg/kg     | 7.01 ± 2.87                               | 6.63 ± 2.35                             | 1.41 ± 0.55                        | 7.73 ± 0.27                        | 5.99 ± 3.56                                         | 1.15 ± 0.35                                         |
| 5.0 mg/kg     | 8.36 ± 2.32                               | 7.32 ± 2.85                             | 1.44 ± 0.66                        | 7.47 ± 0.36                        | 6.85 ± 3.18                                         | 1.25 ± 0.49                                         |
| 50 mg/kg      | 4.82 ± 1.66                               | 5.20 ± 3.06                             | 1.13 ± 0.70                        | 6.20 ± 0.54                        | 6.07 ± 3.68                                         | 0.91 ± 0.50                                         |

Data are presented as the mean cell number ± standard deviation based on a total of 10,000 events.  $n = 4-6$  per group. Abbreviations: perfluoro-2-methoxyacetic acid (PFMOAA), perfluoro-2-methoxypropanoic acid (PFMOPrA), and perfluoro-4-methoxybutanoic acid (PFMOBA) \*  $p < 0.05$  versus control.

**Table S8.** Mean ( $\pm$  standard deviation) absolute number of splenic B and natural killer cells from male and female C57BL/6 mice orally exposed to PFMOAA, PFMOPrA, or PFMOBA for 30 days. Cells were analyzed by flow cytometry one day after dosing ended.

| PFMOAA<br><i>Male</i>  | B cell (e <sup>7</sup> ) | NK cell (e <sup>6</sup> ) | PFMOAA <i>Female</i>  | B cell (e <sup>7</sup> ) | NK cell (e <sup>6</sup> ) |
|------------------------|--------------------------|---------------------------|-----------------------|--------------------------|---------------------------|
| 0.0 mg/kg              | 1.48 $\pm$ 0.71          | 1.01 $\pm$ 0.37           | 0.0 mg/kg             | 2.24 $\pm$ 0.02          | 1.37 $\pm$ 0.07           |
| 0.00025 mg/kg          | 1.22 $\pm$ 0.69          | 1.11 $\pm$ 0.35           | 0.00025 mg/kg         | 2.17 $\pm$ 1.00          | 1.35 $\pm$ 0.42           |
| 0.025 mg/kg            | 2.33 $\pm$ 1.30          | 1.22 $\pm$ 0.41           | 0.025 mg/kg           | 1.26 $\pm$ 0.20          | 1.01 $\pm$ 0.23           |
| 2.5 mg/kg              | 2.93 $\pm$ 0.75          | 1.85 $\pm$ 0.56           | 2.5 mg/kg             | 1.86 $\pm$ 0.88          | 0.89 $\pm$ 0.14           |
| PFMOPrA<br><i>Male</i> | B cell (e <sup>7</sup> ) | NK cell (e <sup>6</sup> ) | PFMOPrA <i>Female</i> | B cell (e <sup>7</sup> ) | NK cell (e <sup>6</sup> ) |
| 0.0 mg/kg              | 1.80 $\pm$ 0.14          | 1.45 $\pm$ 0.28           | 0.0 mg/kg             | 1.80 $\pm$ 0.15          | 1.98 $\pm$ 0.36           |
| 0.5 mg/kg              | 2.14 $\pm$ 0.25          | 1.54 $\pm$ 0.22           | 0.00025 mg/kg         | 1.55 $\pm$ 0.25          | 1.86 $\pm$ 0.28           |
| 5.0 mg/kg              | 1.12 $\pm$ 0.21          | 0.81 $\pm$ 0.23           | 0.025 mg/kg           | 2.23 $\pm$ 0.20          | 2.27 $\pm$ 0.36           |
| 50 mg/kg               | 2.06 $\pm$ 0.50          | 1.35 $\pm$ 0.24           | 2.5 mg/kg             | 1.19 $\pm$ 0.38          | 1.56 $\pm$ 0.45           |
| PFMOBA<br><i>Male</i>  | B cell (e <sup>6</sup> ) | NK cell (e <sup>5</sup> ) | PFMOBA <i>Female</i>  | B cell (e <sup>7</sup> ) | NK cell (e <sup>6</sup> ) |
| 0.0 mg/kg              | 5.50 $\pm$ 2.46          | 5.06 $\pm$ 2.16           | 0.0 mg/kg             | 1.92 $\pm$ 0.62          | 2.27 $\pm$ 0.85           |
| 0.5 mg/kg              | 10.90 $\pm$ 1.20*        | 10.42 $\pm$ 1.61*         | 0.00025 mg/kg         | 1.48 $\pm$ 0.59          | 1.73 $\pm$ 0.75           |
| 5.0 mg/kg              | 11.07 $\pm$ 2.16*        | 9.95 $\pm$ 2.04*          | 0.025 mg/kg           | 1.64 $\pm$ 0.39          | 1.82 $\pm$ 0.51           |
| 50 mg/kg               | 8.83 $\pm$ 1.72*         | 9.16 $\pm$ 2.11*          | 2.5 mg/kg             | 1.00 $\pm$ 0.31*         | 1.04 $\pm$ 0.45*          |

Data are presented as the mean cell number  $\pm$  standard deviation based on a total of 10,000 events.  $n = 4\text{--}6$  animals per group.\* Abbreviations: perfluoro-2-methoxyacetic acid (PFMOAA), perfluoro-2-methoxypropanoic acid (PFMOPrA), perfluoro-4-methoxybutanoic acid (PFMOBA), and natural killer (NK).

\*  $p < 0.05$  versus control.
